# Supplementary material for: Light and pH dual-responsive spiropyran-based cellulose nanocrystals
Source: Royal Society of Chemistry journal article supplement (doi:10.1039/d3ra01637d), 2023-01-01
Supplement: d3ra01637d1.pdf [file d3ra01637d1.pdf]

## Supporting Information

### Light and pH dual-responsive spiropyran-based cellulose nanocrystals

Xiu Ye<sup>a, b</sup>, Anzhe Wang<sup>c</sup>, Dongyang Zhang<sup>d</sup>, Peng Zhou<sup>b\*</sup>, Pengli Zhu<sup>a\*</sup>

<sup>a</sup> Shenzhen Institutes of Advanced Electronic Materials, Shenzhen Institutes of Advanced Technology, Chinese Academy of Sciences, Shenzhen 518055, China

<sup>b</sup> Institute of Intelligent Manufacturing Technology, Shenzhen Polytechnic, Shenzhen 518055, China.

<sup>c</sup> School of Materials Science and Engineering, Nanjing Institute of Technology, Nanjing 211167, China

<sup>d</sup> Institute of Critical Materials for Integrated Circuits, Shenzhen Polytechnic, Shenzhen, 518055, China.

E-mail address: yx444131997@gmail.com (X. Ye); zhoupenghit@szpt.edu.cn (P. Zhou); pl.zhu@siat.ac.cn (P. Zhu)

Tel: 86-755-26731946

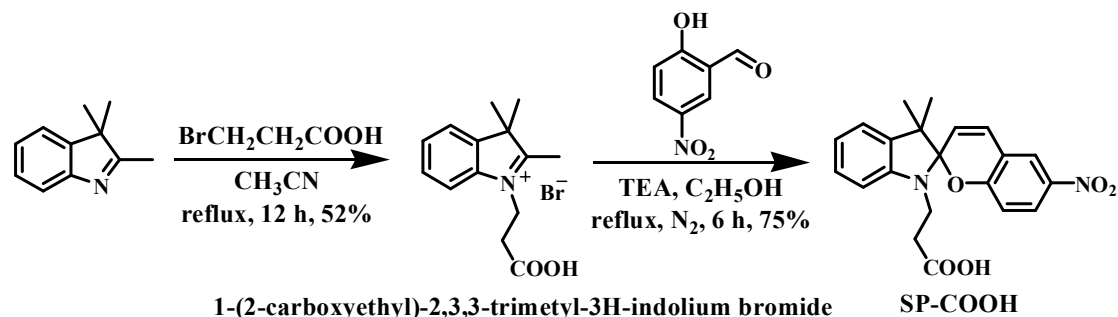

**Scheme S1.** Synthesis route of SP-COOH.

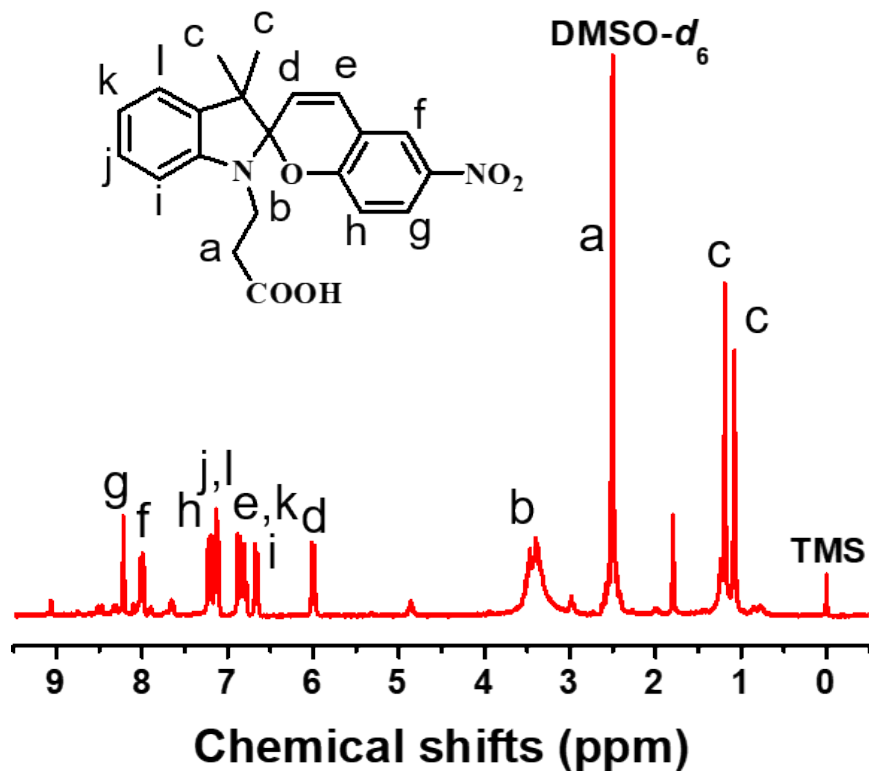

**Figure S1** <sup>1</sup>H-NMR spectrum of SP-COOH in DMSO-*d*<sub>6</sub>.

<sup>1</sup>H-NMR (400 MHz, DMSO-*d*<sub>6</sub>): (TMS, ppm) 1.07 (s, 3H), 1.19 (s, 3H), 2.49 (m, 2H), 3.40 (m, 1H), 3.46 (m, 1H), 6.02 (d, *J* = 12.0 Hz, 1H), 6.66 (d, *J* = 8.0 Hz, 1H), 6.78 (t, *J* = 8.0 Hz, 1H), 6.86 (d, *J* = 12.0 Hz, 1H), 7.13 (t, *J* = 8.0 Hz, 1H), 7.18 (s, 1H), 7.22 (s, 1H), 8.01 (dd, *J* = 12.0 Hz, 1H), 8.22 (d, *J* = 4.0 Hz, 1H).

ESI-2019-N036-1 #10-12 RT: 0.27-0.33 AV: 3 NL: 4.99E8  
T: - c ESI Full ms [50.00-2000.00]

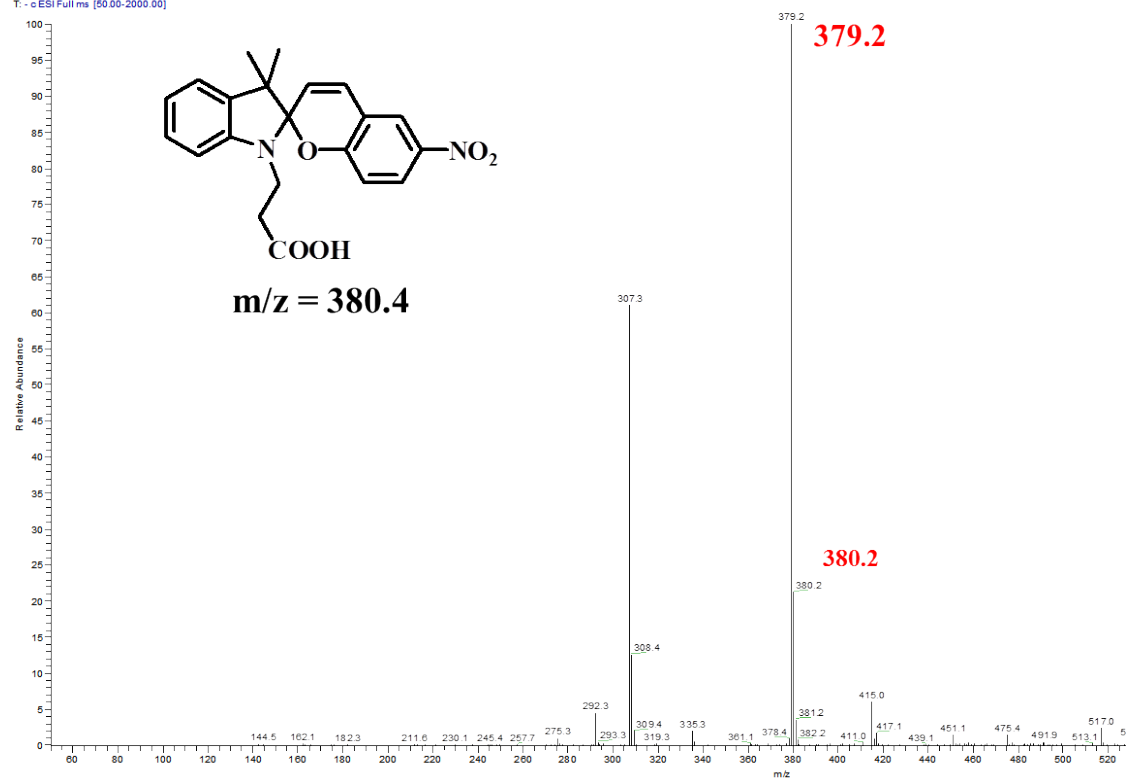

**Figure S2** ESI-MS spectrum of SP-COOH.
